# Supplementary material
Source: publisher figshare collection journal article supplement (https://acs.figshare.com/ndownloader/files/4165345)
Supplement: Supplementary file 1 [file 4165345]

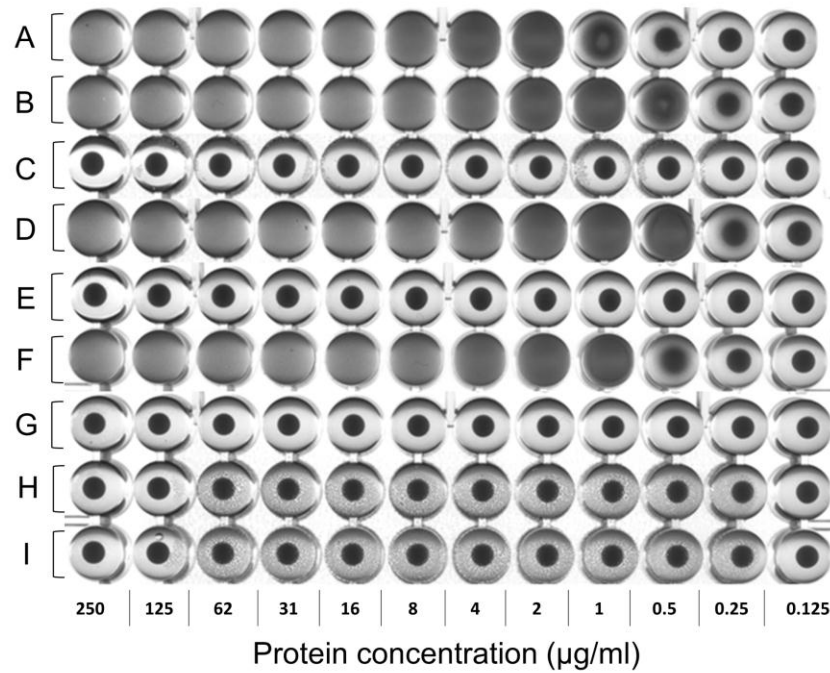

**Figure S1 Hemagglutination activities of native FIP-*fve*, wild type and site-directed rFIP-*fve* mutants.** Hemagglutination activity toward 100  $\mu$ l/ml of 2% human red blood cells in PBS of native FIP-*fve* (**A**), wild type rFIP-*fve*, (**B**), W24G (**C**), T28N (**D**), D34G (**E**), T90A (**F**), I91A (**G**) and W111G (**H**) mutants rFIP-*fve* in 100  $\mu$ l, respectively. Reaction mixtures were placed in 96-well microtiter plates and incubated at 37 °C. Hemagglutination activities of serially diluted mixtures ranges from 250 to 0.125 ( $\mu$ g/ml) were recorded following 1.5 h incubation. Serially diluted GST (**I**) was added instead of rFIP-*fve* to human red blood cells as a control.

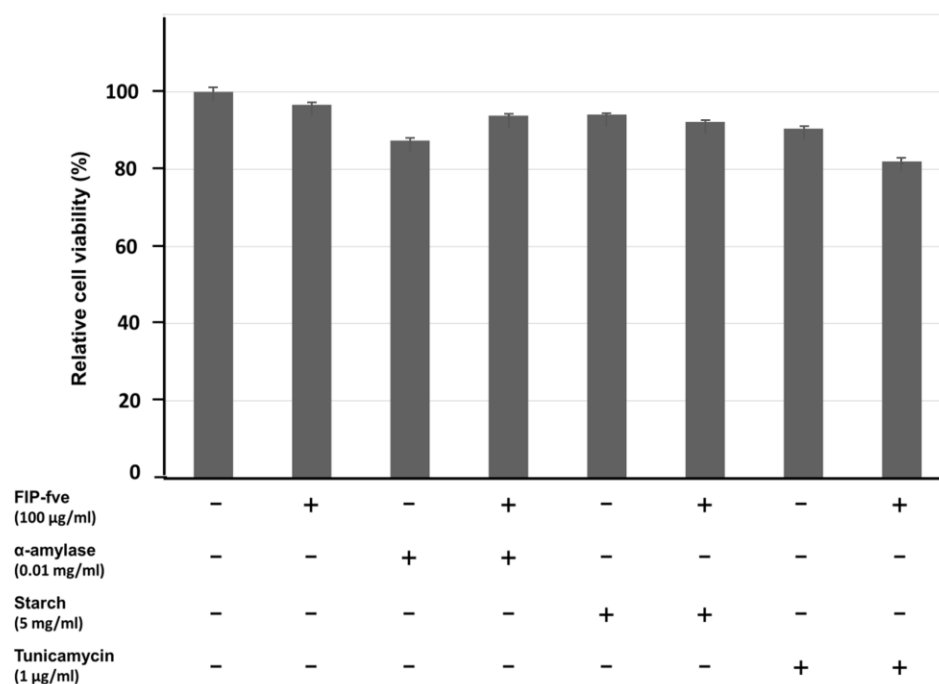

**Figure S2 Effects of FIP-*fve*,  $\alpha$ -amylase, Starch and Tunicamycin treatments on hPBMCs cell viability.** hPBMCs ( $2 \times 10^6$ /well) cells were treated with concentrations of 100 µg/ml FIP-*fve*, 0.01 mg/ml  $\alpha$ -amylase, 5 mg/ml starch and 1 µg/ml Tunicamycin for 48 h followed by MTT assay to estimate the cell viability. The data are presented as mean  $\pm$  SD of triplicate experiments.

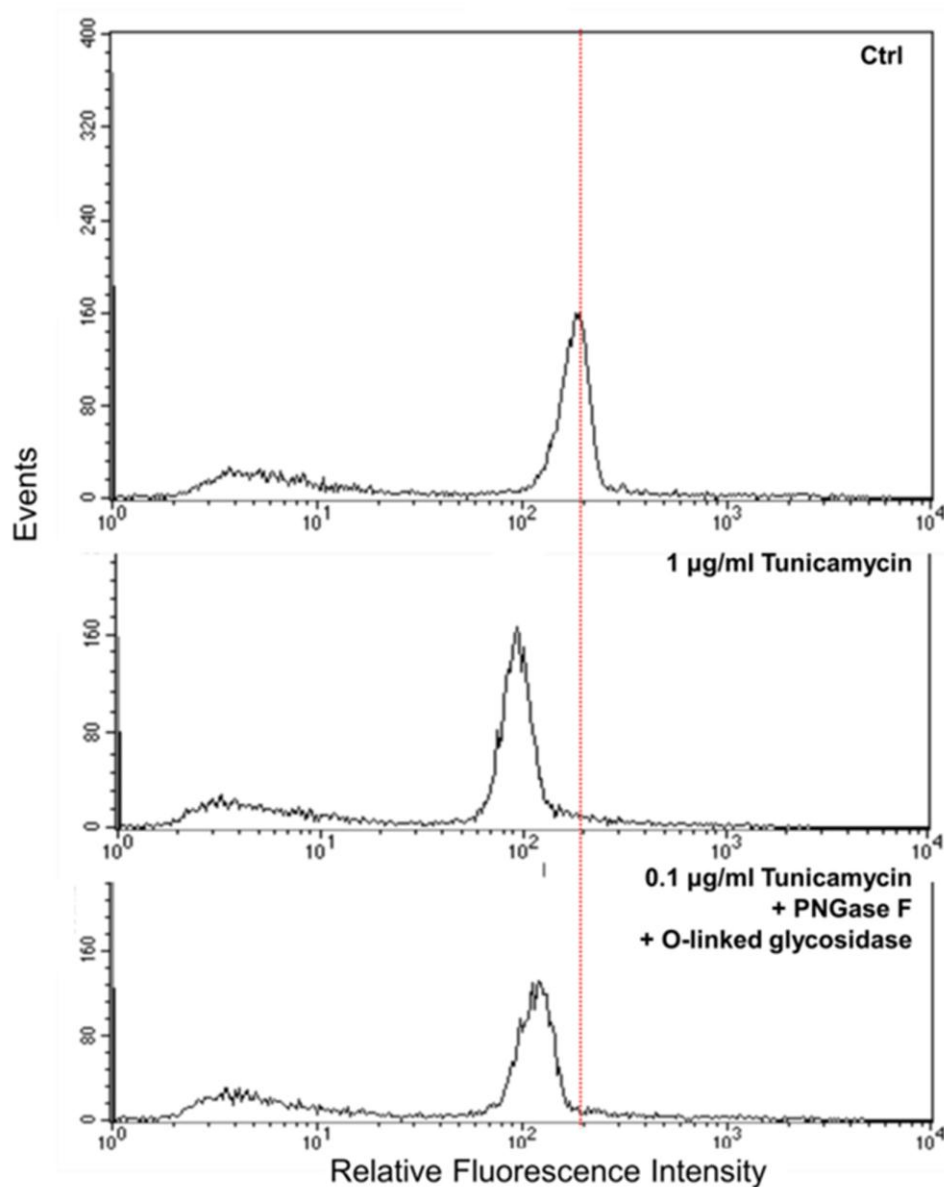

**Figure S3 Influence of tunicamycin and glycosidase enzymes treatment to be confirmed the hPBMC cell surface glycoproteins in ability to recognize *O*-linked and *N*-linked via FITC-labeled ConA.** Cultured hPBMCs ( $2 \times 10^6$  cells/mL, 1 mL/well) were treated with 1 µg/ml tunicamycin or pretreated with 0.1, µg/ml tunicamycin for 16 h before treated with the deglycosylation enzymes *O*-linked glycosidase ( $8 \times 10^4$  units/ml) and PNGase F ( $1 \times 10^3$  units/ml) for 4 h. At the end of treatment, Con A-FITC (5 µg/ml) was added to the medium and incubated for 30 m. The fluorescence-activated cells were analyzed by flow cytometry.

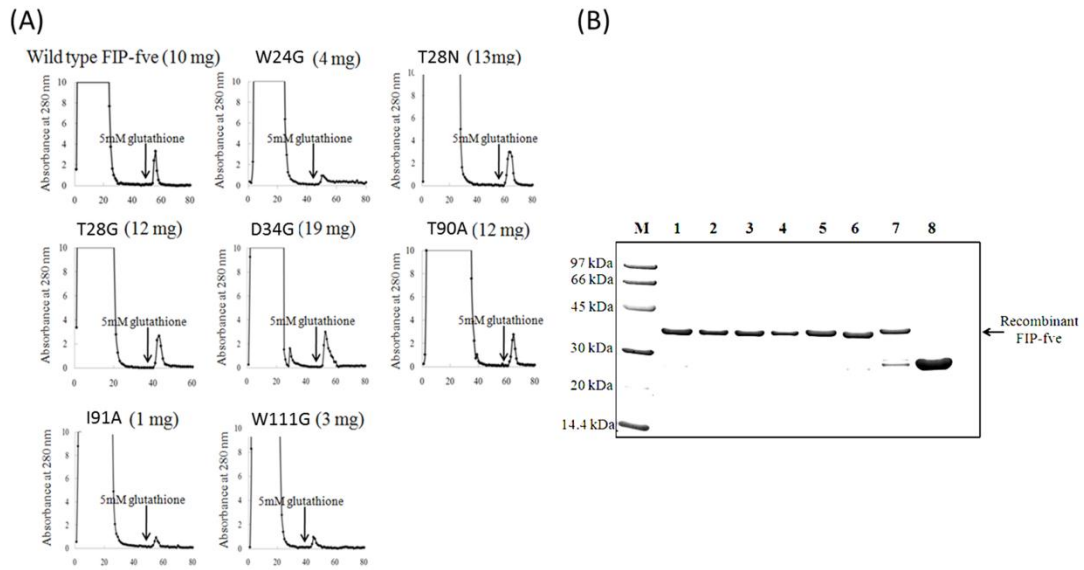

**Figure S4 Verify the purity of the recombinant proteins.** The fusion proteins were purified more than 85% by affinity chromatograph with Glutathione Sepharose<sup>TM</sup> 4 Fast Flow. **(A)** The yields of wild type rFIP-*fve*: 10 mg; W24G: 4 mg; T28N: 13 mg; T28G: 12 mg; D34G: 19 mg; T90A: 12 mg; I91A: 1 mg and W111G: 3 mg. **(B)** 12% SDS PAGE analysis of purified rFIP-*fve*. M: marker; lane 1: wild type rFIP-*fve*; lane 2: rFIP-*fve* mutation W24G; lane 3: rFIP-*fve* mutation T28N; lane 4 rFIP-*fve* mutation D34G; lane 5: rFIP-*fve* mutation T90A; lane 6: rFIP-*fve* mutation I91A; lane 7: rFIP-*fve* mutation W113G; lane 8: GST.

**Table S1** Nucleotide sequences of oligonucleotide primers used for introduction of mutation by site-directed mutagenesis for specific amino acid residues in the putative CBM family 34 of the rFIP-*fve*

| Amino acid substitution | Mutagenic PCR primer (5' -> 3') <sup>a</sup> |
|-------------------------|----------------------------------------------|
| W24G                    | CACCCCCAAC <u>G</u> GGGGCCGTGGTACC           |
| T28G                    | CTGGGGCCGTGGTA <u>A</u> CCCAAGCAGCTAC        |
| T28N                    | CTGGGGCCGTGGT <u>G</u> CCCAAGCAGCTAC         |
| D34G                    | GGTACCCCAAGCAGCTACATCG <u>G</u> CAACC        |
| T90A                    | CGCGGACACCAAAG <u>C</u> GATTCAAGTTTTCG       |
| I91A                    | CGCGGACACCAAAC <u>G</u> GCTCAAGTTTTCG        |
| W111G                   | GGAGTACATCATCGCTGAG <u>G</u> GGGAAGAAGAC     |

a. Mutations are indicated in *bold and underlined*
